# Supplementary material
Source: PubMed Central journal article supplement (PMC4270166)
Supplement: Supp_Figure3.pdf [file Supp_Figure3.pdf]

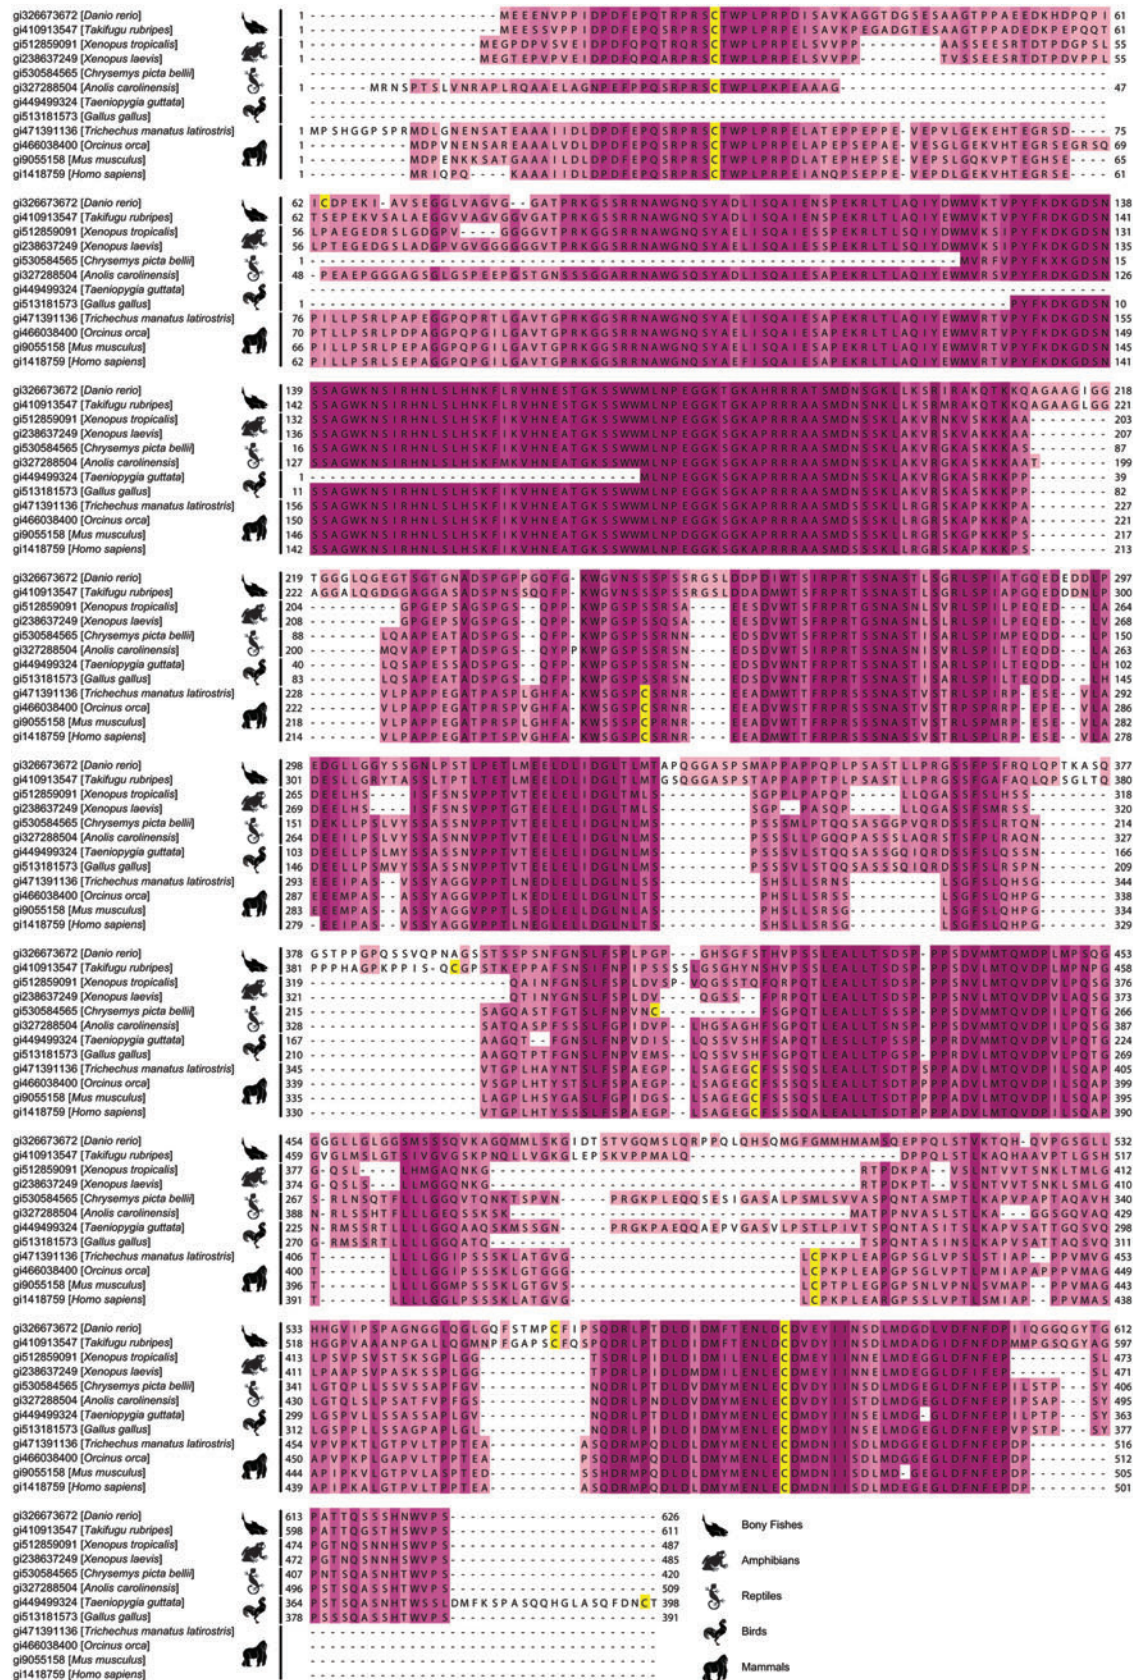

**SUPPLEMENTARY FIG. S3. Conservation of cysteines between vertebrate FOXO4.** Alignment of the protein sequences of ten orthologs of the human Forkhead Box O gene products, shown per paralog (FOXO1 in Supplementary Fig. S2, FOXO3 in Supplementary Fig. S3, and FOXO4 in Supplementary Fig. S4). Sequences of two species of fish, two species of amphibians, two species of reptiles, two species of birds, and four species of mammals were used to determine the extent of conservation and differentiation. The alignments were colored by conservation (threshold 15); darker purple means more conservation or consensus. Cysteine residues were colored yellow in Adobe Illustrator.
