# Supplementary material
Source: PubMed Central journal article supplement (PMC4270166)
Supplement: Supp_Figure5.pdf [file Supp_Figure5.pdf]

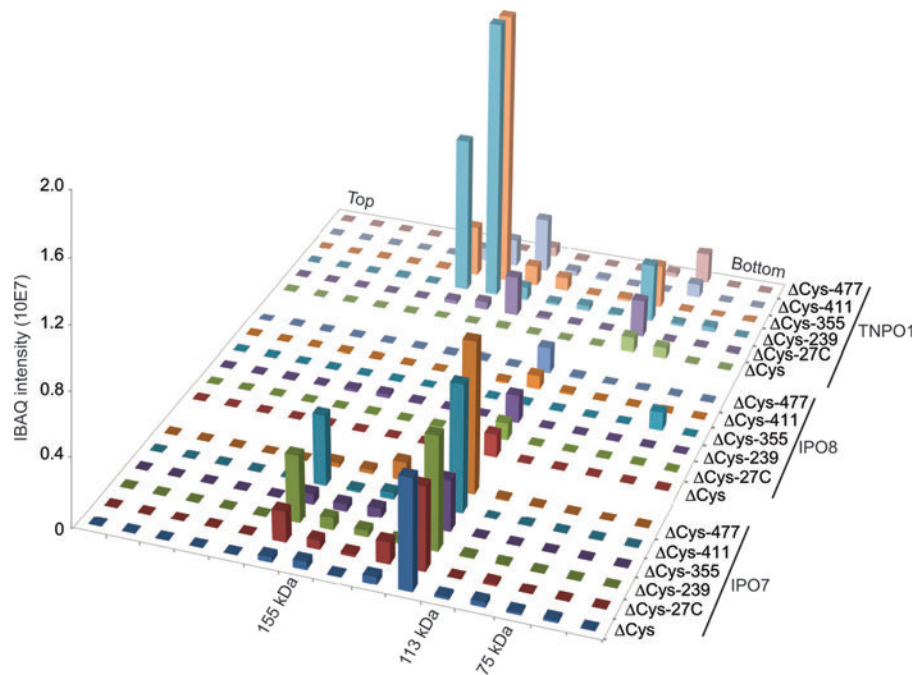

**SUPPLEMENTARY FIG. S5. IPO7, IPO8, and TNPO1 binding to FOXO4.** Representation of the amounts of nuclear import receptors that were identified to bind to FOXO4 in our previously published MS/MS screen (27). Low amounts of IPO7 and IPO8 were found, predominantly at the molecular weight at which the monomeric proteins are expected to migrate (~120 kDa). Substantial amounts of TNPO1 were found to bind specifically to Cys239 in a disulfide-mediated manner.
