# Supplementary material
Source: PubMed Central journal article supplement (PMC4270166)
Supplement: Supp_Figure6.pdf [file Supp_Figure6.pdf]

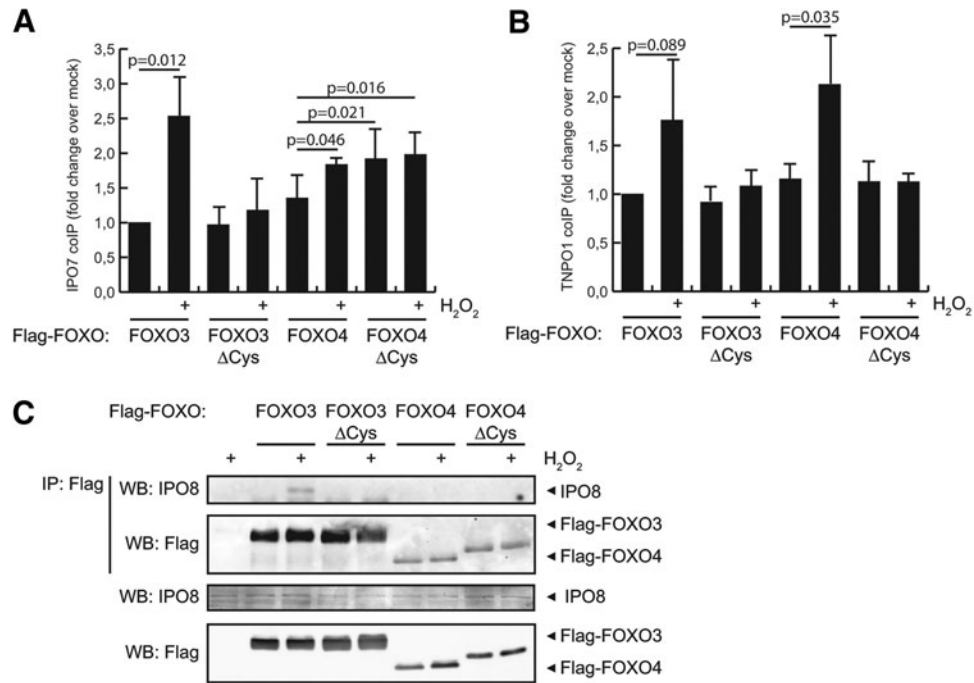

**SUPPLEMENTARY FIG. S6. IPO7 and IPO8 are cysteine-disulfide-dependent binding partners of FOXO3. (A and B)** Quantification of four independent IPO7 (A) and TNPO1 (B) co-IP experiments, as shown in Figure 4C. Signal was corrected for total levels of IPO7 and TNPO1, respectively, and normalized to the mock-treated sample. Error bars represent standard deviations, and *p*-values were calculated in a two-tailed Student's *t*-test. (C) Flag-FOXO3 and 4 co-IPs show that IPO8 is a FOXO3-specific cysteine-dependent interaction partner.
