# Supplementary material
Source: PubMed Central journal article supplement (PMC4270166)
Supplement: Supp_Figure7.pdf [file Supp_Figure7.pdf]

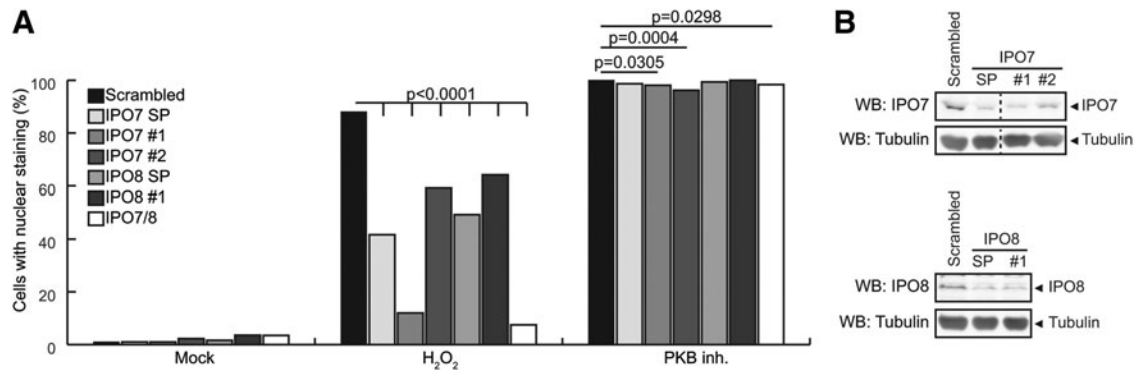

**SUPPLEMENTARY FIG. S7. IPO7 and IPO8 are required for ROS-induced nuclear translocation of FOXO3.** (A) Inducible GFP-FOXO3 expression in U2OS cells transfected with negative control (Scrambled), IPO7 smartpool, IPO7 single oligos (#1 and #2), IPO8 smartpool, IPO8 single oligo (#1), or both IPO7 and IPO8 smartpool siRNAs and incubated with H<sub>2</sub>O<sub>2</sub> or PKB inhibitor. Localization of GFP-FOXO3 was assessed in >300 cells, and *p*-values were calculated in a Fischer's exact test using a 2×2 contingency table. The percentage of cells exhibiting nuclear FOXO3 localization is plotted. (B) Western blot for IPO7 and IPO8 on lysates from inducible GFP-FOXO3 U2OS cells transfected with the indicated siRNAs.
