# Supplementary material
Source: PubMed Central journal article supplement (PMC4270166)
Supplement: Supp_Figure8.pdf [file Supp_Figure8.pdf]

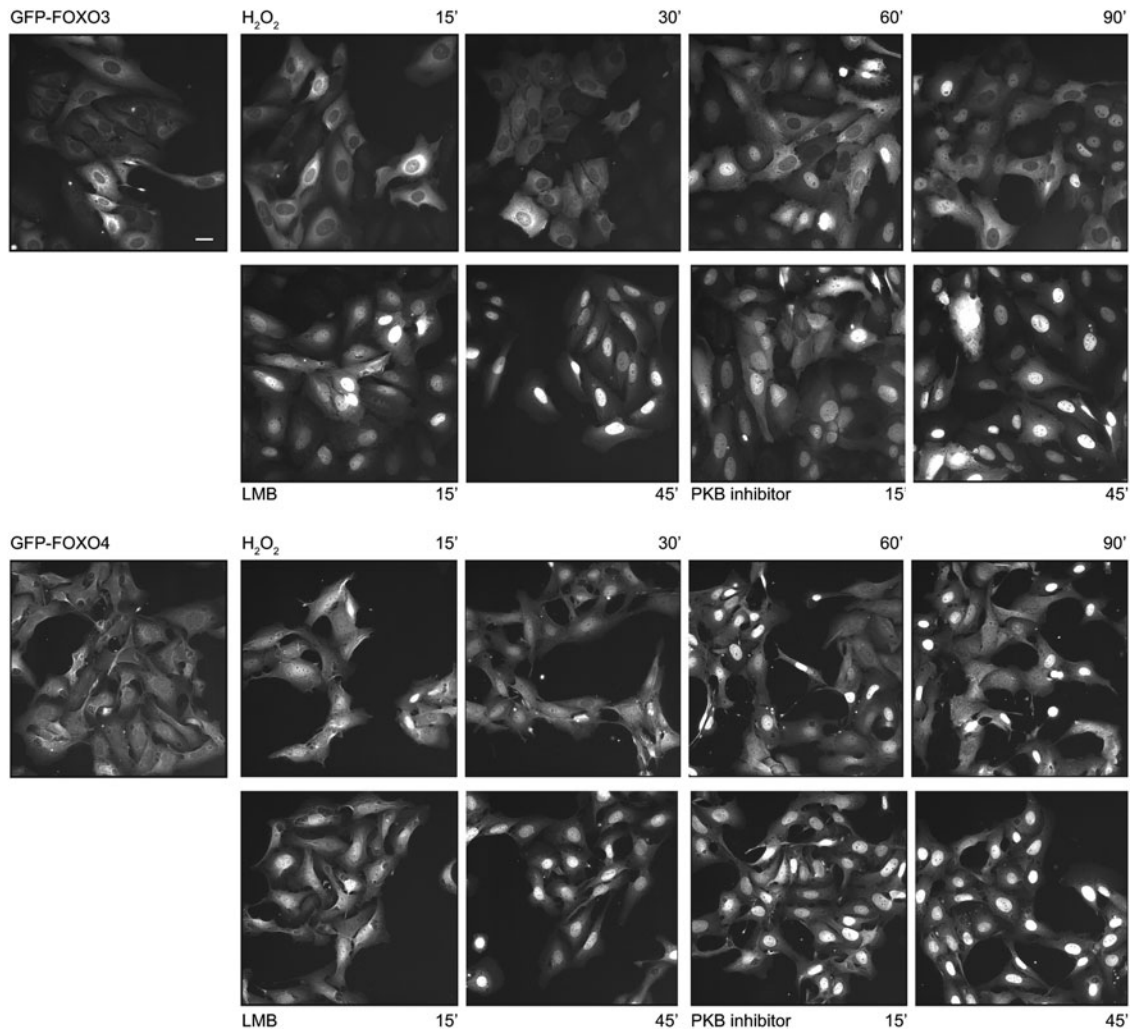

**SUPPLEMENTARY FIG. S8. Comparison of FOXO3 and FOXO4 localization upon changes in growth factor or redox signaling.** U2OS cells expressing GFP-FOXO3 or GFP-FOXO4 localization were incubated with  $H_2O_2$ , PKB inhibitor, or nuclear exporter (Crm1) inhibitor LMB and fixed after the indicated time points. Whereas the dynamics of nuclear accumulation of the two homologs upon PKB or Crm1 inhibition are similar, nuclear accumulation upon  $H_2O_2$  treatment differs. Scale bar represents 20  $\mu m$ .
