# Supplementary material
Source: PubMed Central journal article supplement (PMC4270166)
Supplement: Supp_Figure9.pdf [file Supp_Figure9.pdf]

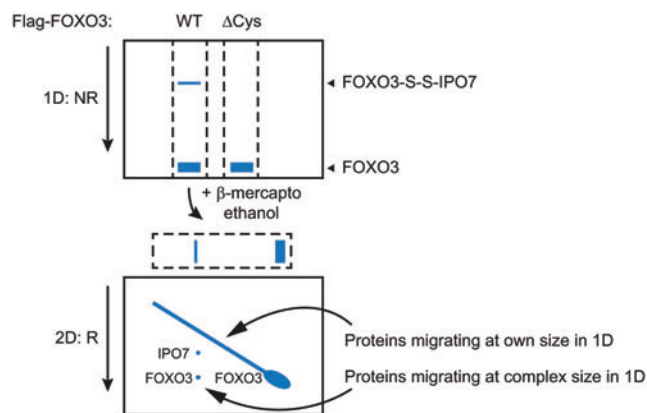

**SUPPLEMENTARY FIG. S9. Schematic representation of a diagonal SDS-PAGE experiment.** In the first direction, the sample migrates under nonreducing conditions. Disulfide-dependent complexes migrate at the total size of the complex, whereas all other proteins migrate at their own molecular weight. The complete lane is excised and reduced in a Laemmli sample buffer and then analyzed on a second SDS-PAGE gel in the other dimension. Proteins that migrate at their own molecular weight in the first dimension run in the diagonal in the second dimension, whereas proteins involved in a cysteine-disulfide-dependent (reduction-sensitive) complex migrate at the size of the complex in the first dimension and at their own molecular weight (*below* the diagonal) after reduction.
